# Supplementary material for: Incident atrial fibrillation and the risk of fracture in the cardiovascular health study
Source: Springer Nature journal article supplement (doi:10.1007/s00198-016-3778-1), 2016-10-07
Supplement: MOESM2 [file 10831652]

| **Supplemental Table 1. Incident AF and the risk of fracture, by fracture type and selected characteristics** | | | | | |
| --- | --- | --- | --- | --- | --- |
|  | **No AF** | **Incident AF** |  |  |  |
| **Outcome and characteristic** | **Rate per 1,000 person-years** | **Rate per 1,000 person-years** | **Minimally adjusted HR (95% CI)a** | **Adjusted HR (95% CI)b** | **p for interaction** |
| **Any fracture** |  |  |  |  |  |
| Race |  |  |  |  |  |
| White | 18.9 | 24.2 | 1.11 (0.89, 1.37) | 0.96 (0.77, 1.21) | 0.94 |
| Non-white | 9.4 | 11.9 | 0.89 (0.35, 2.25) | 1.00 (0.39, 2.53) |  |
| Warfarin use |  |  |  |  |  |
| Yes | 3.4 | 18.3 | 1.18 (0.82, 1.68) | 1.81 (0.86, 3.82) | 0.08 |
| No | 18.9 | 25.9 | 1.06 (0.83, 1.35) | 0.90 (0.69, 1.17) |  |
| CHADS2 score |  |  |  |  |  |
| > 2 points | 15.4 | 21.4 | 1.00 (0.78, 1.28) | 0.99 (0.77, 1.29) |  |
| <2 points | 25.2 | 32.6 | 1.37 (0.97, 1.94) | 0.91 (0.60, 1.39) | 0.74 |
| **Hip fracture** |  |  |  |  |  |
| Race |  |  |  |  |  |
| White | 10.4 | 16.6 | 1.23 (0.96, 1.60) | 1.08 (0.82, 1.43) | 0.78 |
| Non-white | 3.9 | 7.0 | 1.07 (0.32, 3.60) | 1.29 (0.38, 4.39) |  |
| Warfarin use |  |  |  |  |  |
| Yes | 1.4 | 12.9 | 1.46 (0.97, 2.21) | 2.98 (1.02, 8.65) | 0.05 |
| No | 10.2 | 17.3 | 1.14 (0.85, 1.53) | 0.99 (0.72, 1.35) |  |
| CHADS2 score |  |  |  |  |  |
| > 2 points | 8.8 | 14.8 | 1.13 (0.85, 1.52) | 1.10 (0.81, 1.51) | 0.90 |
| <2 points | 12.2 | 20.9 | 1.51 (0.79, 2.29) | 1.06 (0.65, 1.76) |  |
| a Adjusted for age, sex, race and clinic  b Adjusted for age, sex, race, clinic, education, BMI, smoking, alcohol use, physical activity, hypertension (time-varying), coronary heart disease (time-varying), diabetes (time-varying), and use of bisphosphonates (time-varying) | | | | | |
